# Supplementary material for: Tuning Rashba–Dresselhaus effect with ferroelectric polarization at asymmetric heterostructural interface
Source: Royal Society of Chemistry journal article supplement (doi:10.1039/d3mh00635b), 2023-10-24
Supplement: d3mh00635b1.pdf [file d3mh00635b1.pdf]

## Supplementary Materials

*for*

### *Tuning Rashba-Dresselhaus effect with ferroelectric polarization at asymmetric hetero-structural interface*

*Bangmin Zhang,<sup>1,\*</sup> Chunhua Tang,<sup>2</sup> Ping Yang,<sup>3</sup> Jingsheng Chen<sup>2,\*</sup>*

<sup>1</sup>Guangdong Provincial Key Laboratory of Magnetoelectric Physics and Devices, Centre for Physical Mechanics and Biophysics, School of Physics, Sun Yat-sen University, Guangzhou 510275, China.

<sup>2</sup>Department of Materials Science & Engineering, National University of Singapore, 9 Engineering Drive 1, 117576, Singapore.

<sup>3</sup>Singapore Synchrotron Light Source (SSLS), National University of Singapore, 5 Research Link, 117603, Singapore.

\*Corresponding authors: [zhangbm5@mail.sysu.edu.cn](mailto:zhangbm5@mail.sysu.edu.cn), [msecj@nus.edu.sg](mailto:msecj@nus.edu.sg)

## **Outline**

**S1: Crystal structure**

**S2: Magnetic and transport properties**

**S3: AMR fitting for superlattice with BTO  $t = 5$  uc**

**S4: EELS for superlattice fabricated at low temperature**

**S5: Determine the atomic position**

**S6: MH loops**

**S7: AMR fitting for superlattice with different BTO  $t$**

## S1: Crystal structure

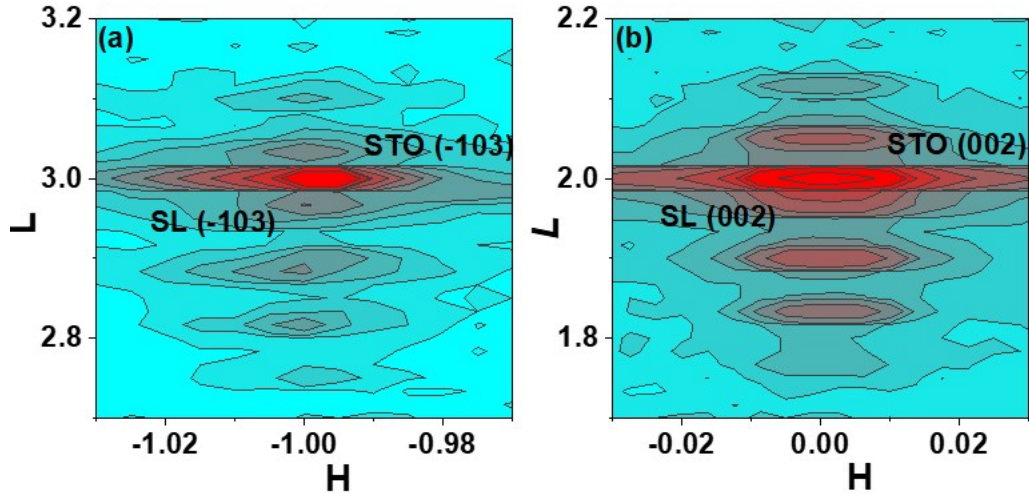

Figure S1: The (002) and (-103) reciprocal space mapping for  $\text{TiO}_2$ -SL with  $t = 5$  unit cells.

## S2: Magnetic and transport properties

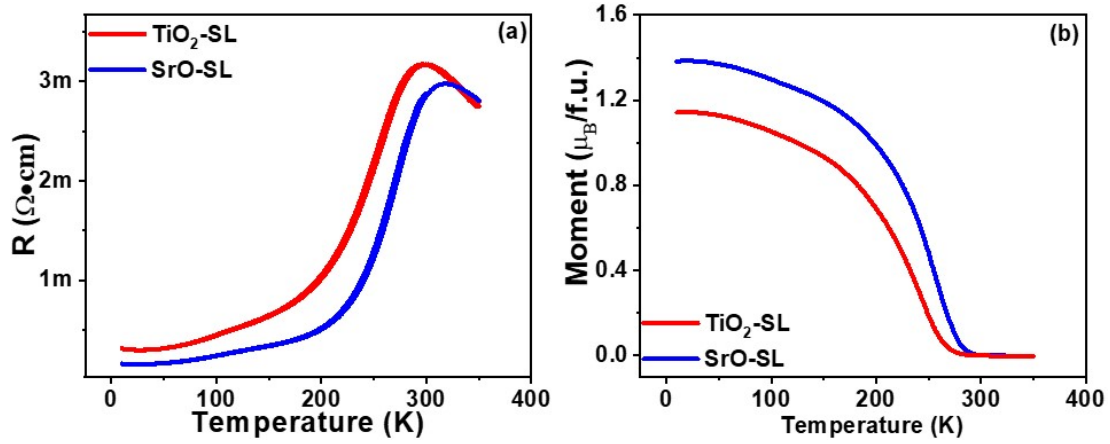

Figure S2: (a) the resistivity-temperature curve and (b) magnetization-temperature curve with in-plane 100 Oe field for  $\text{TiO}_2$ - and  $\text{SrO}$ -SL with  $t = 5$  unit cells.

### S3: AMR fitting for superlattice with BTO $t = 5$ uc

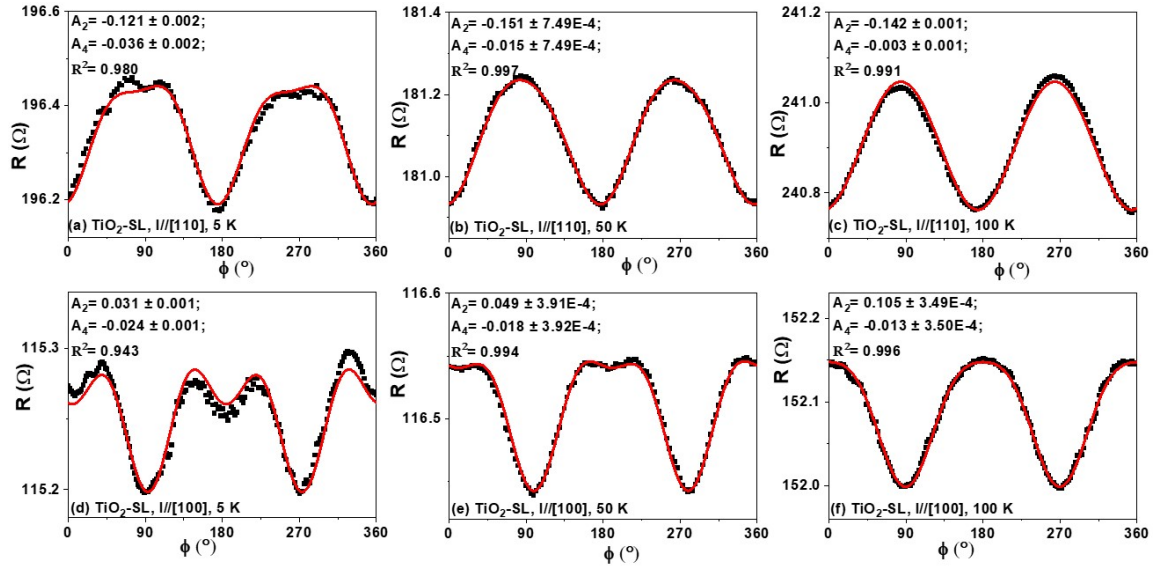

Figure S3-1: the measured AMR and corresponded fitting with  $I//[110]$  (a-c) and  $I//[100]$  under 9 T at different temperatures for  $\text{TiO}_2$ -SL. See detailed discussion in Figure 2 of main text.

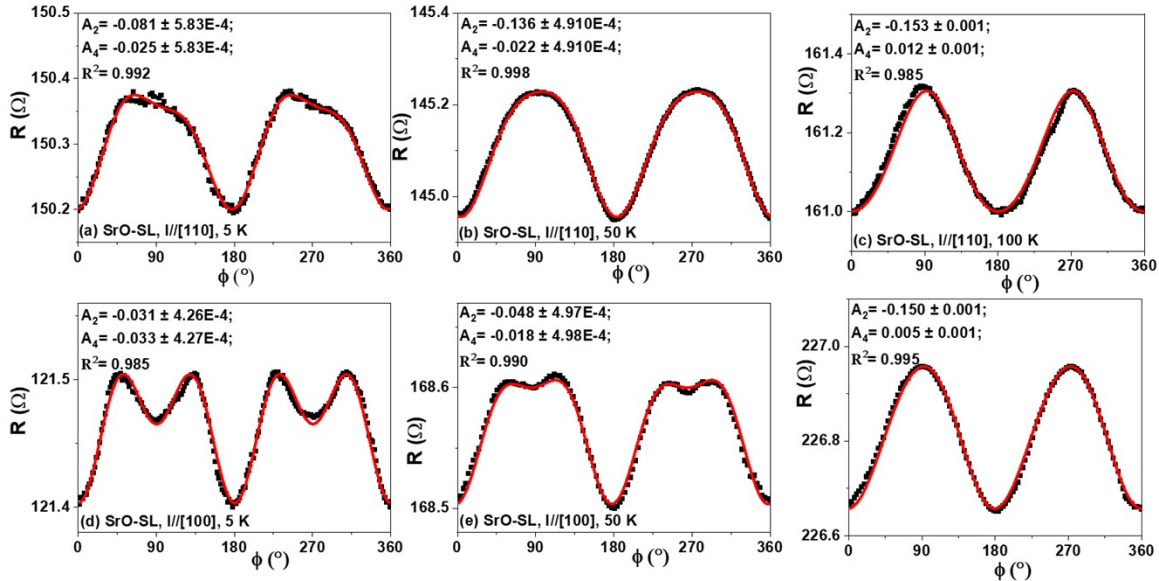

Figure S3-1: the measured AMR and corresponded fitting with  $I//[110]$  (a-c) and  $I//[100]$  under 9 T at different temperatures for  $\text{SrO}$ -SL. See detailed discussion in Figure 2 of main text.

**S4: EELS for superlattice fabricated at low temperature**

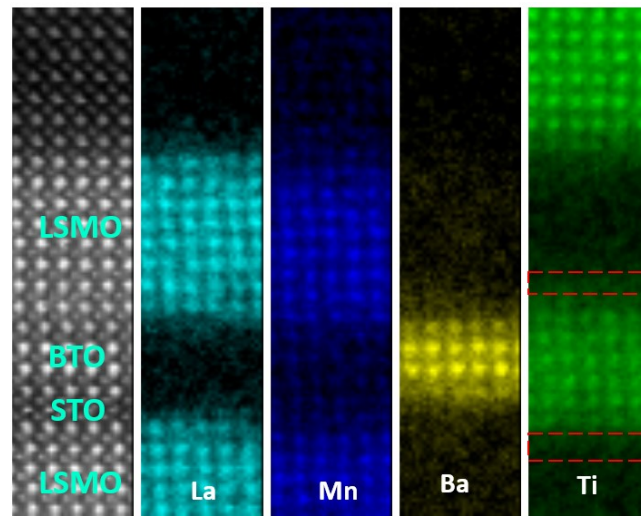

Figure S4: The high-resolution STEM image with EELS for superlattice fabricated at a set point of 850 °C with  $t = 5$  unit cells.

## S5: Determine the atomic position

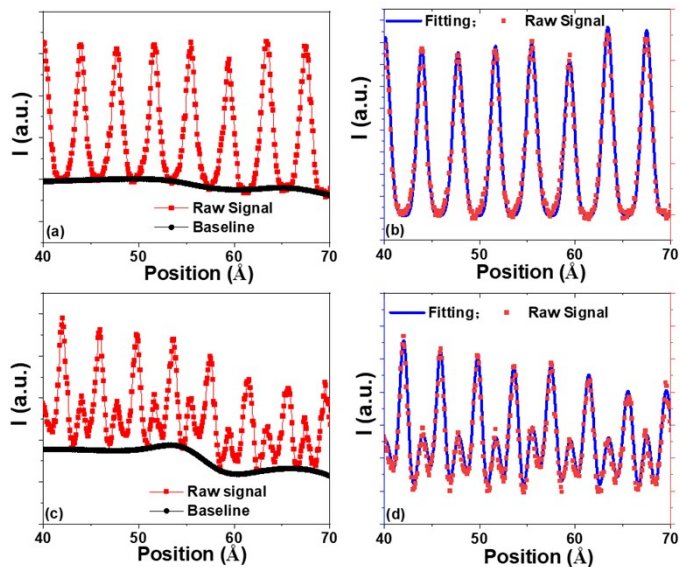

Figure S5-1: The line scan and corresponding data process (a-b) of BO<sub>2</sub> plane to obtain the B site-, and (c-d) of AO plane to obtain the A site-atomic position for SrO-SL.

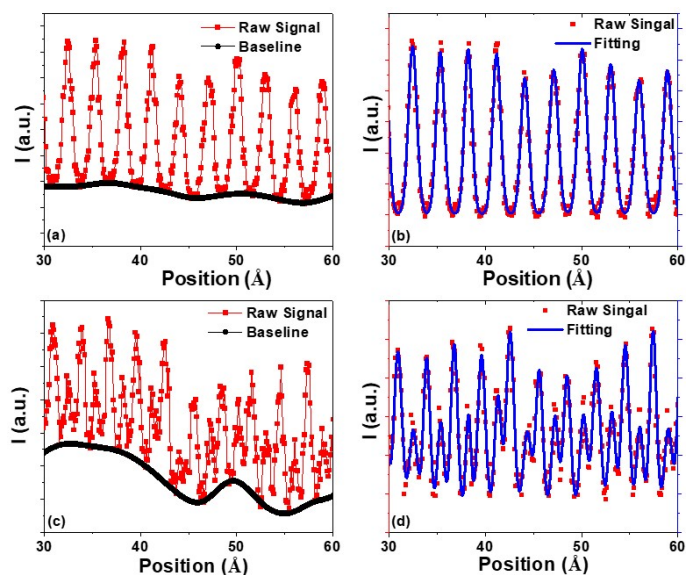

Figure S5-2: The line scan and corresponding data process (a-b) of BO<sub>2</sub> plane to obtain the B site-, and (c-d) of AO plane to obtain the A site-atomic position for TiO<sub>2</sub>-SL.

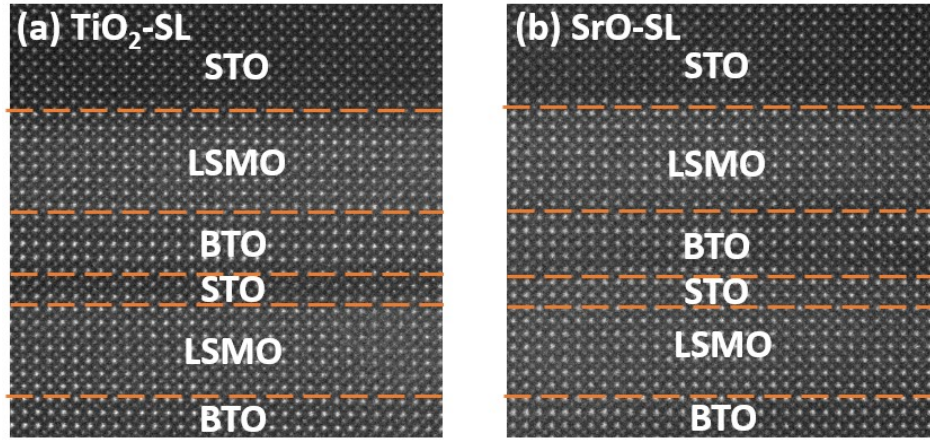

Figure S5-3: The high-resolution STEM image for (a) TiO<sub>2</sub>- and (b) SrO-SL with  $t = 5$  unit cells.

### S6: MH loops

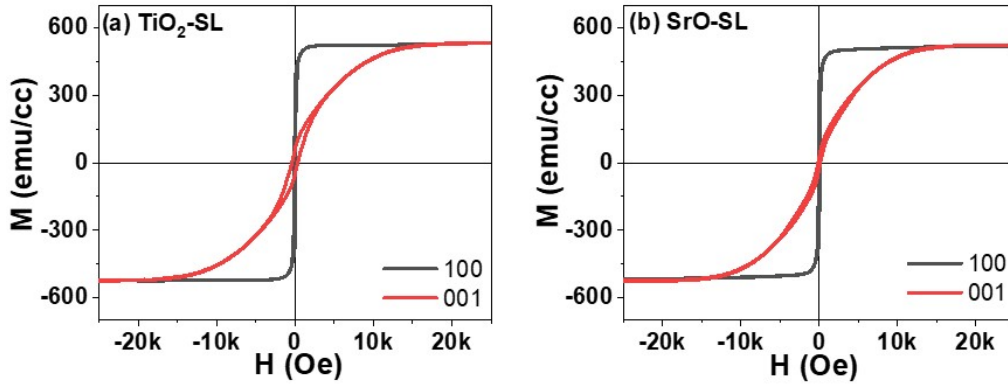

Figure S6: The MH loop for (a)  $\text{TiO}_2$ - and (b)  $\text{SrO}$ -SL with  $t = 5$  unit cells at 5 K.

### S7: AMR fitting for superlattice with different BTO $t$

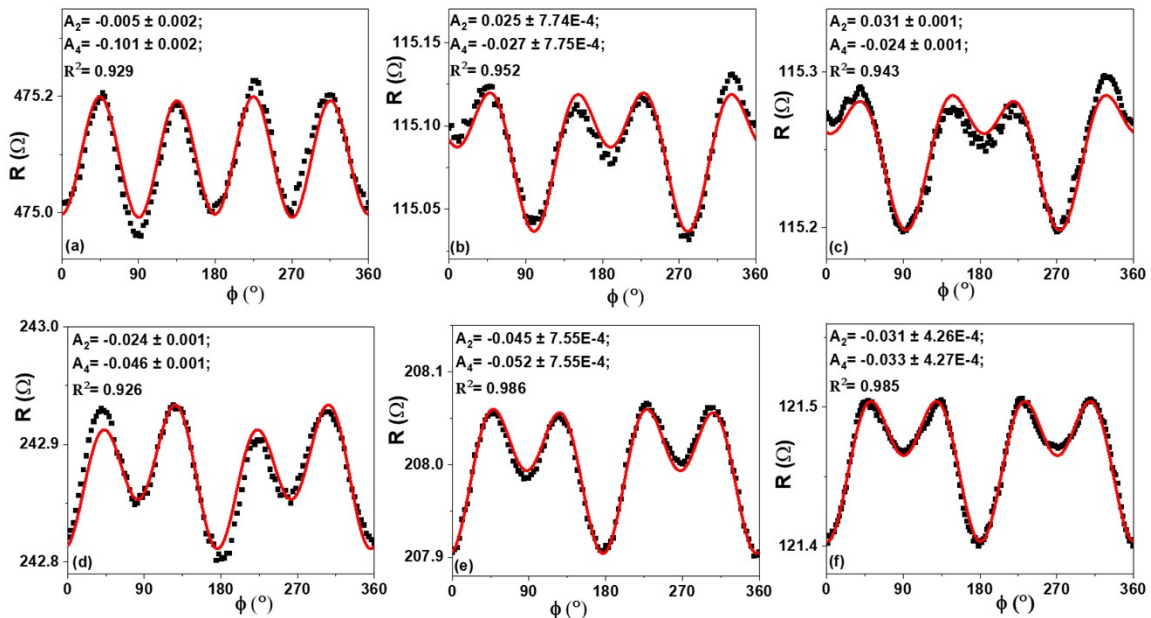

Figure S7: the measured AMR and corresponded fitting with  $I//[100]$  under 9 T, 5 K (a-c) for  $\text{TiO}_2$  -SL with BTO  $t = 1$  UC, 3 UC and 5 UC, respectively; (d-f) for  $\text{SrO}$  -SL with BTO  $t = 1$  UC, 3 UC and 5 UC, respectively.
